# Supplementary material for: Synthesis, Structural Characterization, and Water Vapor Sorption Behavior of Two Ligand Ratio-Dependent Supramolecular Networks, [Cd(2,2′-bpym)1.5(BDC)]·0.5(2,2′-bpym)·5H2O and [Cd(2,2′-bpym)0.5(BDC)(H2O)3]
Source: PubMed Central journal article supplement — ACS Omega. 2022 Apr 14;7(16):14089–101. doi: 10.1021/acsomega.2c00652 (PMC9089378; doi:10.1021/acsomega.2c00652), 2022-04-14
Supplement: ao2c00652_si_001.pdf [file ao2c00652_si_001.pdf]

# Synthesis, Structural Characterization and Water Vapor Sorption Behavior of Two Ligands-ratio Dependent Supramolecular Networks, $[\text{Cd}(2,2'\text{-bpym})_{1.5}(\text{BDC})]\cdot 0.5(2,2'\text{-bpym})\cdot 5\text{H}_2\text{O}$ and $[\text{Cd}(2,2'\text{-bpym})_{0.5}(\text{BDC})(\text{H}_2\text{O})_3]$

Chih-Chieh Wang,<sup>\*a</sup> Geng-Min Lin,<sup>b</sup> Cheng-Han Lin,<sup>a</sup> Tsai-Wen Chang,<sup>a</sup> Szu-Yu Ke,<sup>a</sup>

Chuan-Yien Liu,<sup>a</sup> Gene-Hsiang Lee,<sup>c</sup> Bo-Hao Chen<sup>d</sup> and Yu-Chun Chuang<sup>\*d</sup>

<sup>a</sup>*Department of Chemistry, Soochow University, Taipei 11102, Taiwan. Fax: 886-2-28811053, Email: ccwang@scu.edu.tw.*

<sup>b</sup>*Department of Chemistry and Center for Emerging Material and Advanced Devices, National Taiwan University, Taipei 10617, Taiwan.*

<sup>c</sup>*Instrumentation Center, National Taiwan University, Taipei 10617, Taiwan.*

<sup>d</sup>*National Synchrotron Radiation Research Center, Hsinchu 30076, Taiwan.*

Table S1 Selected bond lengths (Å) and angle (°) around Cd(II) ion for **1**

Table S2 The parameters of O–H···N and O–H···O hydrogen bonds for **1**

Table S3  $\pi$ – $\pi$  interactions (face-to-face) between pyrimidyl rings of 2,2'-bpym ligands in **1**

Table S4 Selected bond lengths (Å) and angle (°) around Cd(II) ion for **2**

Table S5 The parameters of O–H···O hydrogen bonds for **2**

Table S6 Selected bond lengths (Å) and angle (°) around Cd(II) ion for **3**

Table S7 The parameters of O–H···N and O–H···O hydrogen bonds for **3**

Table S8  $\pi$ – $\pi$  interactions (face-to-face) between pyrimidyl rings of 2,2'-bpym ligands and benzene ring of BDC<sup>2-</sup> ligands in **3**

Figure S1 Coordination environments about Cd ion in  $[\text{Cd}(2,2'\text{-bpym})_{1.5}(\text{BDC})]\cdot 0.5(2,2'\text{-bpym})\cdot 5\text{H}_2\text{O}$  (**1**) with atom labelling scheme (ORTEP drawing, 50 % thermal ellipsoids). Hydrogen atoms, guest H<sub>2</sub>O and bpym molecules are omitted for clarity.

Figure S2 Coordination environments about Cd(1) ion in  $[\text{Cd}(2,2'\text{-bpym})_{0.5}(\text{BDC})(\text{H}_2\text{O})_3]$  (**2**) with atom labelling scheme (ORTEP drawing, 30 % thermal ellipsoids). Hydrogen atoms are omitted for clarity.

Figure S3 Coordination environments about Cd ion in  $[\text{Cd}(2,2'\text{-bpym})(\text{BDC})(\text{H}_2\text{O})]\cdot 3\text{H}_2\text{O}$  (**3**) with atom labelling scheme (ORTEP drawing, 50 % thermal ellipsoids).

Hydrogen atoms and guest H<sub>2</sub>O are omitted for clarity.

Figure S4 (a) Thermogravimetric (TG) measurement of **1**. (b) Temperature-dependent powder X-ray diffraction patterns of **1** from room temperature to 200 °C and its simulation from single-crystal diffraction data. The baselines for each temperature were shifted for clarity.

Figure S5 (a) Thermogravimetric (TG) measurement of **2**. (b) Temperature-dependent powder X-ray diffraction patterns of **2** from room temperature to 200 °C and its simulation from single-crystal diffraction data. The baselines for each temperature were shifted for clarity.

Figure S6 (a) N<sub>2</sub> ad-/desorption isotherms of dehydrated species **1** at 77 K. (b) N<sub>2</sub> ad-/desorption isotherms of dehydrated species **2** at 77 K.

**Table S1.** Selected bond lengths (Å) and angle (°) around Cd(II) ion for **1<sup>a</sup>**

|                            |           |                            |           |
|----------------------------|-----------|----------------------------|-----------|
| Cd–O(3)                    | 2.205(1)  | Cd–O(1)                    | 2.345(2)  |
| Cd–N(3)                    | 2.358(2)  | Cd–N(2) <sub>i</sub>       | 2.408(2)  |
| Cd–N(6)                    | 2.445(2)  | Cd–N(1)                    | 2.451(2)  |
| Cd–O(2)                    | 2.622(2)  |                            |           |
| O(3)–Cd–O(1)               | 87.87(6)  | O(3)–Cd–N(3)               | 101.52(5) |
| O(1)–Cd–N(3)               | 125.13(6) | O(3)–Cd–N(2) <sub>i</sub>  | 150.65(6) |
| O(1)–Cd–N(2) <sub>i</sub>  | 84.81(6)  | N(3)–Cd–N(2) <sub>i</sub>  | 105.93(5) |
| O(3)–Cd–N(6)               | 101.20(6) | O(1)–Cd–N(6)               | 161.45(6) |
| N(3)–Cd–N(6)               | 69.26(5)  | N(2) <sub>i</sub> –Cd–N(6) | 79.38(5)  |
| O(3)–Cd–N(1)               | 82.57(5)  | O(1)–Cd–N(1)               | 76.92(6)  |
| N(3)–Cd–N(1)               | 157.40(5) | N(2) <sub>i</sub> –Cd–N(1) | 68.10(5)  |
| N(6)–Cd–N(1)               | 88.14(5)  | O(3)–Cd–O(2)               | 117.34(6) |
| O(1)–Cd–O(2)               | 51.72(6)  | N(3)–Cd–O(2)               | 77.08(5)  |
| N(2) <sub>i</sub> –Cd–O(2) | 79.33(5)  | N(6)–Cd–O(2)               | 132.93(5) |
| N(1)–Cd–O(2)               | 121.10(5) |                            |           |

<sup>a</sup>Symmetry transformations used to generate equivalent atoms: ( i ) –x, –y, 1–z.

**Table S2.** The parameters of O–H...N and O–H...O hydrogen bonds for **1**<sup>a</sup>

| D–H (Å)                | D...A(Å)                               | H...A(Å)                                | ∠ D–H...Acceptor(°)                            |
|------------------------|----------------------------------------|-----------------------------------------|------------------------------------------------|
| O(5)–H(5A)<br>0.782(4) | O(5)...N(7) <sub>i</sub><br>2.920(2)   | H(5A)...N(7) <sub>i</sub><br>2.152(4)   | ∠ O(5)–H(5A)...N(7) <sub>i</sub><br>167.0(4)   |
| O(5)–H(5B)<br>0.800(4) | O(5)...O(7)<br>2.824(2)                | H(5B)...O(7)<br>2.027(4)                | ∠ O(5)–H(5B)...O(7)<br>173.8(4)                |
| O(6)–H(6A)<br>0.815(4) | O(6)...O(2) <sub>ii</sub><br>2.868(2)  | H(6A)...O(2) <sub>ii</sub><br>2.068(4)  | ∠ O(6)–H(6A)...O(2) <sub>ii</sub><br>167.1(4)  |
| O(6)–H(6B)<br>0.802(4) | O(6)...O(5)<br>2.814(2)                | H(6B)...O(5)<br>2.014(4)                | ∠ O(6)–H(6B)...O(5)<br>175.1(4)                |
| O(7)–H(7A)<br>0.806(4) | O(7)...N(4) <sub>iii</sub><br>3.023(2) | H(7A)...N(4) <sub>iii</sub><br>2.227(4) | ∠ O(7)–H(7A)...N(4) <sub>iii</sub><br>169.8(4) |
| O(7)–H(7B)<br>0.805(4) | O(7)...O(6) <sub>iv</sub><br>2.888(2)  | H(7B)...O(6) <sub>iv</sub><br>2.091(4)  | ∠ O(7)–H(7B)...O(6) <sub>iv</sub><br>171.6(4)  |
| O(8)–H(8A)<br>0.794(4) | O(8)...O(9) <sub>v</sub><br>2.744(2)   | H(8A)...O(9) <sub>v</sub><br>1.963(4)   | ∠ O(8)–H(8A)...O(9) <sub>v</sub><br>167.6(4)   |
| O(8)–H(8B)<br>0.806(4) | O(8)...O(1)<br>2.749(2)                | H(8B)...O(1)<br>1.944(4)                | ∠ O(8)–H(8B)...O(1)<br>176.3(4)                |
| O(9)–H(9A)<br>0.771(4) | O(9)...O(8)<br>2.726(2)                | H(9A)...O(8)<br>1.991(4)                | ∠ O(9)–H(9A)...O(8)<br>159.3(4)                |
| O(9)–H(9B)<br>0.760(4) | O(9)...O(6)<br>2.843(2)                | H(9B)...O(6)<br>2.085(4)                | ∠ O(9)–H(9B)...O(6)<br>175.2(4)                |

<sup>a</sup>Symmetry operations used to generate equivalent atoms: (i) 1–x, 1–y, 1–z; (ii) 1+x, y, z; (iii) –x, 1–y, 1–z; (iv) 1–x, –y, 1–z; (v) 1–x, –y, –z.

**Table S3.**  $\pi$ – $\pi$  interactions (face-to-face) between pyrimidyl rings of 2,2'-bpym ligands in **1**<sup>a</sup>

| Ring(i) →<br>Ring(j)      | Slip angle<br>(i,j)/° | Interplanar<br>(i,j) distance/<br>Å | Horizontal shift<br>between the (i,j)<br>ring centroids/Å | Distance between<br>the (i,j) ring<br>centroids/Å |
|---------------------------|-----------------------|-------------------------------------|-----------------------------------------------------------|---------------------------------------------------|
| R(1) → R(1) <sub>i</sub>  | 12.8                  | 3.293                               | 0.749                                                     | 3.377                                             |
| R(2) → R(3) <sub>i</sub>  | 22.3                  | 3.325                               | 1.367                                                     | 3.595                                             |
| R(1) → R(3) <sub>ii</sub> | 26.5                  | 3.296                               | 1.646                                                     | 3.648                                             |

<sup>a</sup>R(i)/R(j) denotes the centroids of i-th/j-th of pyrimidyl/pyrimidyl rings; R(1) = N(5)–C(9)–N(6)–C(12)–C(11)–C(10); R(2) = N(3)–C(8)–N(4)–C(7)–C(6)–C(5); R(3) = N(7)–C(24)–N(8)–C(23)–C(22)–C(21). Symmetry code: (i) –x, 1–y, 1–z; (ii) –1+x, y, z.

**Table S4.** Selected bond lengths (Å) and angle (°) around Cd(II) ion for **2<sup>a</sup>**

|                 |           |                 |           |
|-----------------|-----------|-----------------|-----------|
| Cd(1)–O(6)      | 2.300(2)  | Cd(1)–O(2)      | 2.306(2)  |
| Cd(1)–O(5)      | 2.339(2)  | Cd(1)–O(7)      | 2.363(2)  |
| Cd(1)–N(2)      | 2.369(2)  | Cd(1)–O(1)      | 2.423(2)  |
| Cd(1)–N(1)      | 2.438(2)  |                 |           |
| O(6)–Cd(1)–O(2) | 116.51(6) | O(6)–Cd(1)–O(5) | 81.94(6)  |
| O(2)–Cd(1)–O(5) | 80.65(6)  | O(6)–Cd(1)–O(7) | 163.94(6) |
| O(2)–Cd(1)–O(7) | 78.89(6)  | O(5)–Cd(1)–O(7) | 96.99(6)  |
| O(6)–Cd(1)–N(2) | 85.39(6)  | O(2)–Cd(1)–N(2) | 130.47(6) |
| O(5)–Cd(1)–N(2) | 148.69(6) | O(7)–Cd(1)–N(2) | 87.51(6)  |
| O(6)–Cd(1)–O(1) | 89.35(6)  | O(2)–Cd(1)–O(1) | 55.02(6)  |
| O(5)–Cd(1)–O(1) | 124.50(6) | O(7)–Cd(1)–O(1) | 104.17(6) |
| N(2)–Cd(1)–O(1) | 83.66(6)  | O(6)–Cd(1)–N(1) | 85.25(6)  |
| O(2)–Cd(1)–N(1) | 149.38(6) | O(5)–Cd(1)–N(1) | 81.61(6)  |
| O(7)–Cd(1)–N(1) | 78.74(6)  | N(2)–Cd(1)–N(1) | 68.85(6)  |
| O(1)–Cd(1)–N(1) | 152.31(6) |                 |           |

**Table S5.** The parameters of O–H...O hydrogen bonds for **2<sup>a</sup>**

| D–H (Å)                | D...A(Å)                               | H...A(Å)                                | ∠ D–H...Acceptor(°)                            |
|------------------------|----------------------------------------|-----------------------------------------|------------------------------------------------|
| O(5)–H(5A)<br>0.752(4) | O(5)...O(3) <sub>i</sub><br>2.796(2)   | H(5A)...O(3) <sub>i</sub><br>2.064(4)   | ∠ O(5)–H(5A)...O(3) <sub>i</sub><br>164.6(4)   |
| O(5)–H(5B)<br>0.757(4) | O(5)...O(7) <sub>ii</sub><br>2.865(2)  | H(5B)...O(7) <sub>i</sub><br>2.131(4)   | ∠ O(5)–H(5B)...O(6) <sub>ii</sub><br>163.2(4)  |
| O(6)–H(6A)<br>0.776(4) | O(6)...O(3) <sub>i</sub><br>2.746(2)   | H(6A)...O(3) <sub>i</sub><br>2.020(4)   | ∠ O(6)–H(6A)...O(3) <sub>i</sub><br>155.5(4)   |
| O(6)–H(6B)<br>0.704(4) | O(6)...O(4) <sub>iii</sub><br>2.648(2) | H(6B)...O(4) <sub>iii</sub><br>1.961(4) | ∠ O(6)–H(6B)...O(4) <sub>iii</sub><br>165.4(4) |
| O(7)–H(7A)<br>0.792(4) | O(7)...O(2) <sub>iv</sub><br>2.659(2)  | H(7A)...O(2) <sub>iv</sub><br>1.908(4)  | ∠ O(7)–H(7A)...O(2) <sub>iv</sub><br>157.9(4)  |
| O(7)–H(7B)<br>0.771(4) | O(7)...O(3) <sub>v</sub><br>2.749(2)   | H(7B)...O(3) <sub>v</sub><br>1.990(4)   | ∠ O(7)–H(7B)...O(3) <sub>v</sub><br>167.9(4)   |

<sup>a</sup>Symmetry operations used to generate equivalent atoms: (i)  $-1+x, 1/2-y, -1/2+z$ ; (ii)  $x, 1/2-y, -1/2+z$ ; (iii)  $1-x, -y, -z$ ; (iv)  $x, 1/2-y, 1/2+z$ ; (v)  $-1+x, 1/2-y, 1/2+z$ .

**Table S6.** Selected bond lengths (Å) and angle (°) around Cd(II) ion for **3**

|              |           |              |           |
|--------------|-----------|--------------|-----------|
| Cd–O(4)      | 2.226(2)  | Cd–O(2)      | 2.298(2)  |
| Cd–O(5)      | 2.321(2)  | Cd–N(4)      | 2.391(3)  |
| Cd–N(1)      | 2.462(2)  | Cd–O(1)      | 2.493(2)  |
| O(4)–Cd–O(2) | 116.60(9) | O(4)–Cd–N(5) | 90.17(10) |
| O(2)–Cd–O(5) | 139.85(8) | O(4)–Cd–N(4) | 130.69(9) |
| O(2)–Cd–N(4) | 97.38(8)  | O(5)–Cd–N(4) | 84.42(9)  |
| O(4)–Cd–N(1) | 77.07(9)  | O(2)–Cd–N(1) | 90.97(8)  |
| O(5)–Cd–N(1) | 125.55(9) | N(4)–Cd–N(1) | 67.19(9)  |
| O(4)–Cd–O(1) | 142.90(9) | O(2)–Cd–O(1) | 54.38(8)  |
| O(5)–Cd–O(1) | 86.00(8)  | N(4)–Cd–O(1) | 85.67(9)  |
| N(1)–Cd–O(1) | 133.37(8) |              |           |

**Table S7.** The parameters of O–H...N and O–H...O hydrogen bonds for **3<sup>a</sup>**

| D–H (Å)    | D...A(Å)                   | H...A(Å)                    | ∠ D–H...Acceptor(°)                |
|------------|----------------------------|-----------------------------|------------------------------------|
| O(5)–H(5A) | O(5)...O(6)                | H(5A)...O(6)                | ∠ O(5)–H(5A)...O(6)                |
| 0.887(4)   | 2.726(2)                   | 1.841(4)                    | 175.7(4)                           |
| O(5)–H(5B) | O(5)...N(2) <sub>i</sub>   | H(5B)...N(2) <sub>i</sub>   | ∠ O(5)–H(5B)...N(2) <sub>i</sub>   |
| 0.887(4)   | 3.056(2)                   | 2.233(4)                    | 154.2(4)                           |
| O(5)–H(5B) | O(5)...N(3) <sub>i</sub>   | H(5B)...N(3) <sub>i</sub>   | ∠ O(5)–H(5B)...N(3) <sub>i</sub>   |
| 0.887(4)   | 3.072(2)                   | 2.403(4)                    | 167.1(4)                           |
| O(6)–H(6A) | O(6)...O(1) <sub>ii</sub>  | H(6A)...O(1) <sub>ii</sub>  | ∠ O(6)–H(6A)...O(1) <sub>ii</sub>  |
| 0.868(4)   | 2.850(2)                   | 1.996(4)                    | 167.9(4)                           |
| O(6)–H(6B) | O(6)...O(8) <sub>ii</sub>  | H(6B)...O(8) <sub>ii</sub>  | ∠ O(6)–H(6B)...O(8) <sub>ii</sub>  |
| 0.886(4)   | 2.739(2)                   | 1.857(4)                    | 172.7(4)                           |
| O(7)–H(7A) | O(7)...O(8) <sub>iii</sub> | H(7A)...O(8) <sub>iii</sub> | ∠ O(7)–H(7A)...O(8) <sub>iii</sub> |
| 0.902(4)   | 2.880(2)                   | 2.119(4)                    | 141.5(4)                           |
| O(7)–H(7B) | O(7)...O(1) <sub>ii</sub>  | H(7B)...O(1) <sub>ii</sub>  | ∠ O(7)–H(7B)...O(1) <sub>ii</sub>  |
| 0.899(4)   | 2.962(2)                   | 2.221(4)                    | 139.5(4)                           |
| O(8)–H(8A) | O(8)...O(7) <sub>iv</sub>  | H(8A)...O(7) <sub>iv</sub>  | ∠ O(8)–H(8A)...O(7) <sub>iv</sub>  |
| 0.876(4)   | 2.880(2)                   | 2.302(4)                    | 123.5(4)                           |

<sup>a</sup>Symmetry operations used to generate equivalent atoms: (i) 1/2–x, 3/2+y, 3/2–z; (ii) 3/2–x, 3/2+y, 3/2–z; (iii) 1–x, –y, 1–z; (iv) 1–x, –1–y, 1–z.

**Table S8.**  $\pi$ - $\pi$  interactions (face-to-face) between pyrimidyl rings of 2,2'-bpym ligands and benzene ring of BDC<sup>2-</sup> ligands in **1**<sup>a</sup>

| Ring(i) →<br>Ring(j)      | Slip angle<br>(i,j)/° | Interplanar<br>(i,j) distance/<br>Å | Horizontal shift<br>between the (i,j)<br>ring centroids/Å | Distance between<br>the (i,j) ring<br>centroids/Å |
|---------------------------|-----------------------|-------------------------------------|-----------------------------------------------------------|---------------------------------------------------|
| R(1) → R(2) <sub>i</sub>  | 25.6                  | 3.338                               | 1.596                                                     | 3.700                                             |
| R(3) → R(1) <sub>ii</sub> | 21.9                  | 3.424                               | 1.378                                                     | 3.691                                             |

<sup>a</sup>R(i)/R(j) denotes the centroids of i-th/j-th of pyrimidyl/pyrimidyl rings; R(1) = N(1)-C(1)-C(2)-C(3)-N(2)-C(4); R(2) = N(3)-C(6)-C(7)-C(8)-N(4)-C(5); R(3) = C(13)-C(14)-C(15)-C(13)<sub>iii</sub>-C(14)<sub>iii</sub>-C(15)<sub>iii</sub>. Symmetry code: (i) 1/2-x, 3/2+y, 3/2-z; (ii) 1/2+x, 1/2-y, 1/2+z; (iii) 3/2-x, 3/2+y, 5/2-z.

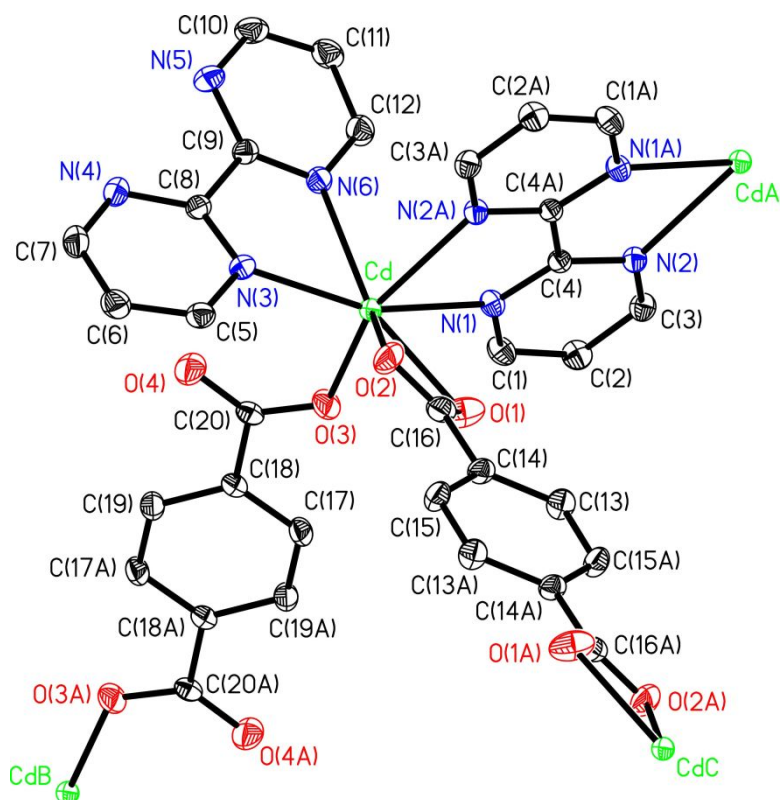

Figure S1. Coordination environments about Cd ion in  $[\text{Cd}(\text{2,2}'\text{-bpym})_{1.5}(\text{BDC})] \cdot 0.5(\text{2,2}'\text{-bpym}) \cdot 5\text{H}_2\text{O}$  (**1**) with atom labelling scheme (ORTEP drawing, 50 % thermal ellipsoids). Hydrogen atoms, guest  $\text{H}_2\text{O}$  and bpym molecules are omitted for clarity.

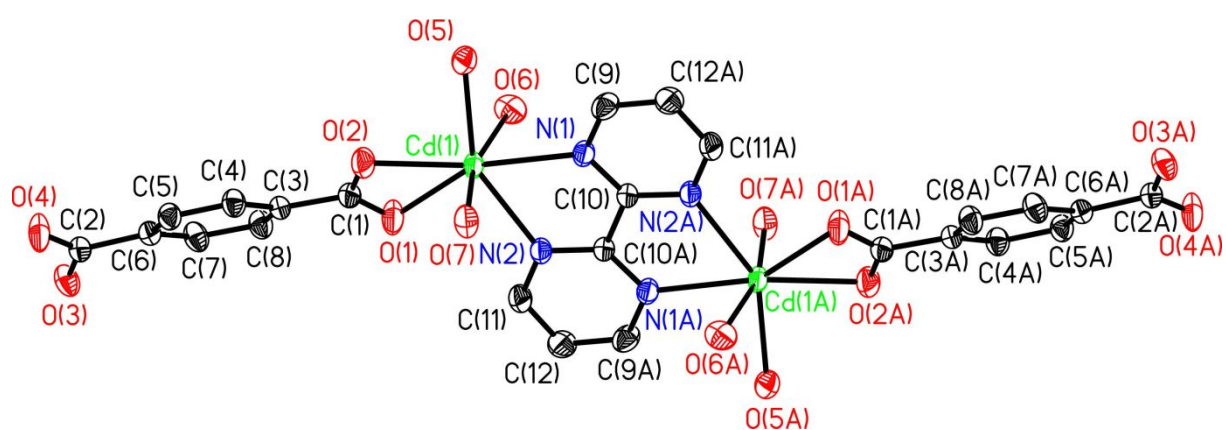

Figure S2. Coordination environments about Cd(1) ion in  $[\text{Cd}(\text{2,2}'\text{-bpym})_{0.5}(\text{BDC})(\text{H}_2\text{O})_3]$  (**2**) with atom labelling scheme (ORTEP drawing, 30 % thermal ellipsoids). Hydrogen atoms are omitted for clarity.



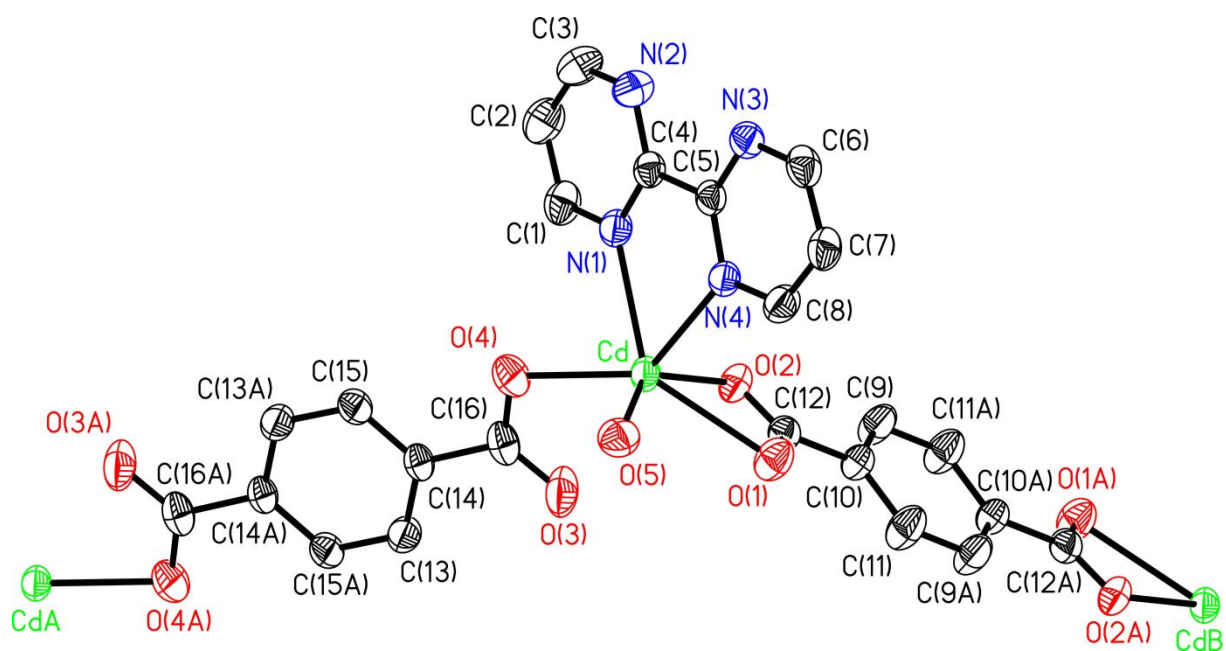

Figure S3. Coordination environments about Cd ion in  $[\text{Cd}(2,2'\text{-bpym})(\text{BDC})(\text{H}_2\text{O})]\cdot 3\text{H}_2\text{O}$  (**3**) with atom labelling scheme (ORTEP drawing, 50 % thermal ellipsoids). Hydrogen atoms and guest  $\text{H}_2\text{O}$  are omitted for clarity.

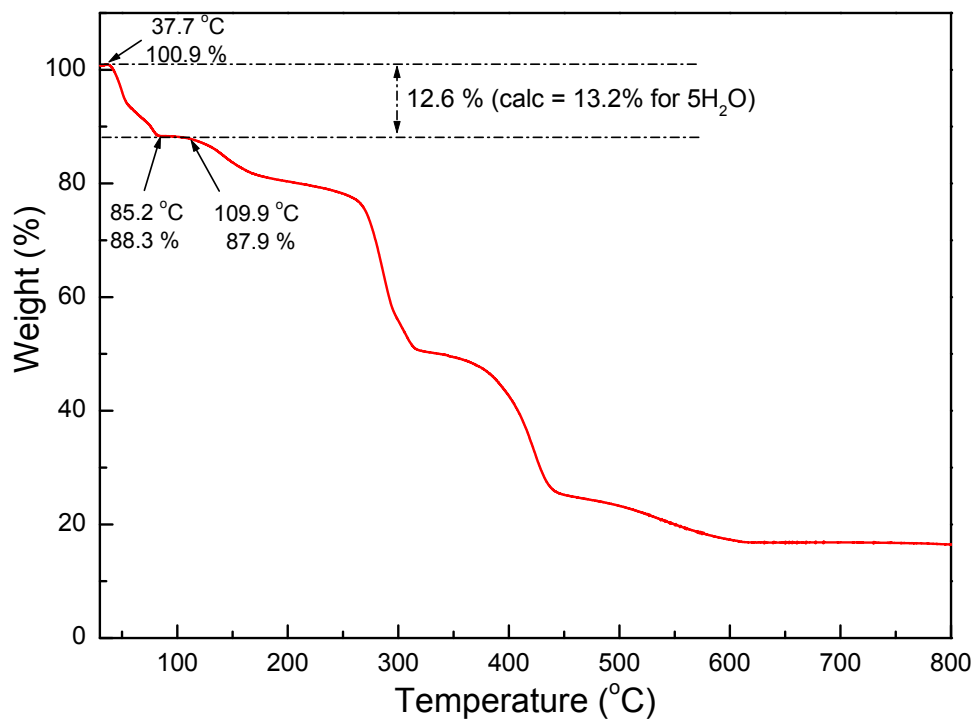

(a)

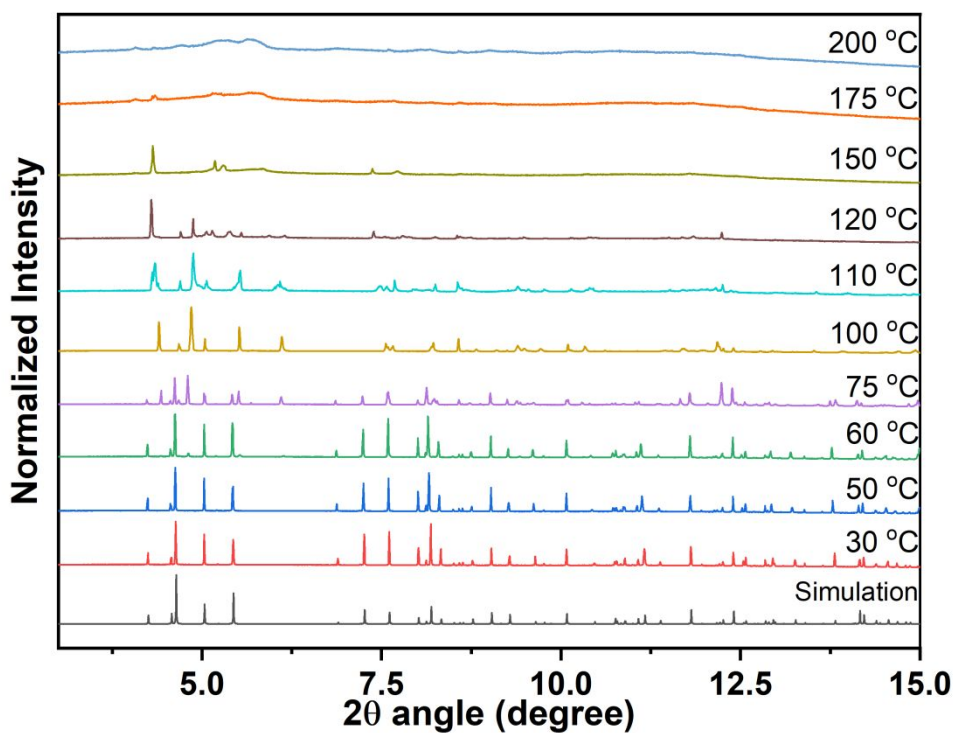

(b)

Figure S4. (a) Thermogravimetric (TG) measurement of **1**. (b) Temperature-dependent powder X-ray diffraction patterns of **1** from room temperature to 200 °C and its simulation from single-crystal diffraction data. The baselines for each temperature were shifted for clarity.

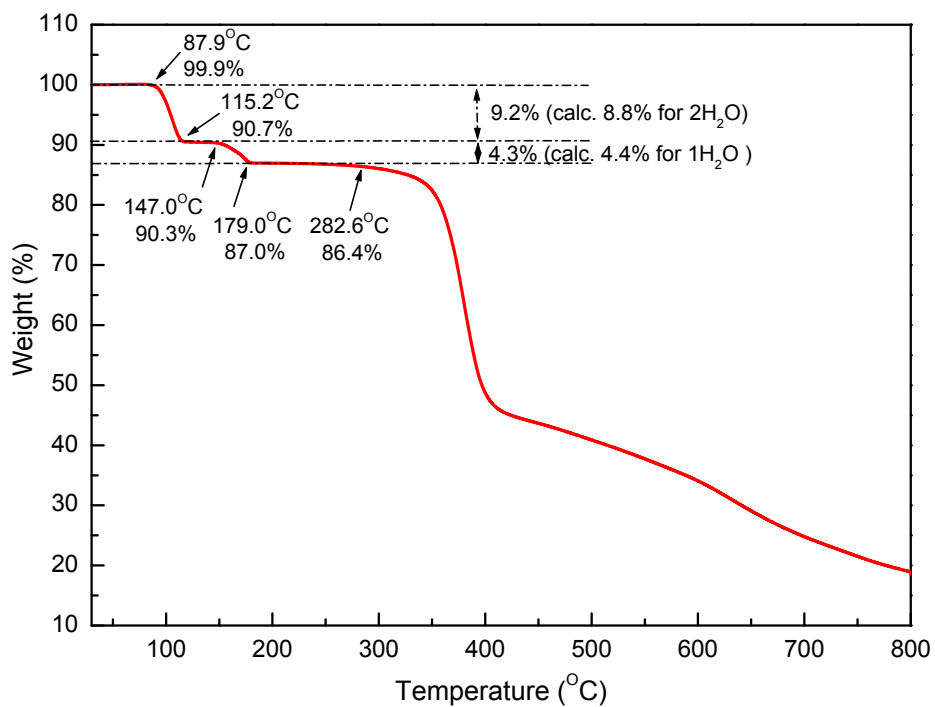

(a)

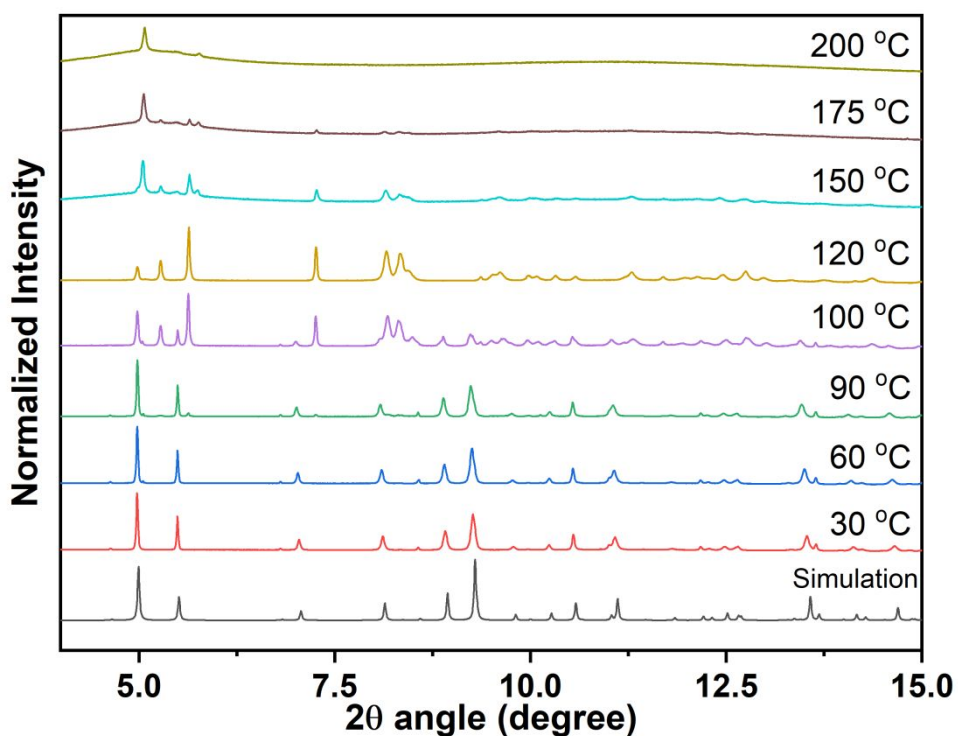

(b)

Figure S5. (a) Thermogravimetric (TG) measurement of **2**. (b) Temperature-dependent powder X-ray diffraction patterns of **2** from room temperature to 200 °C and its simulation from single-crystal diffraction data. The baselines for each temperature were shifted for clarity.

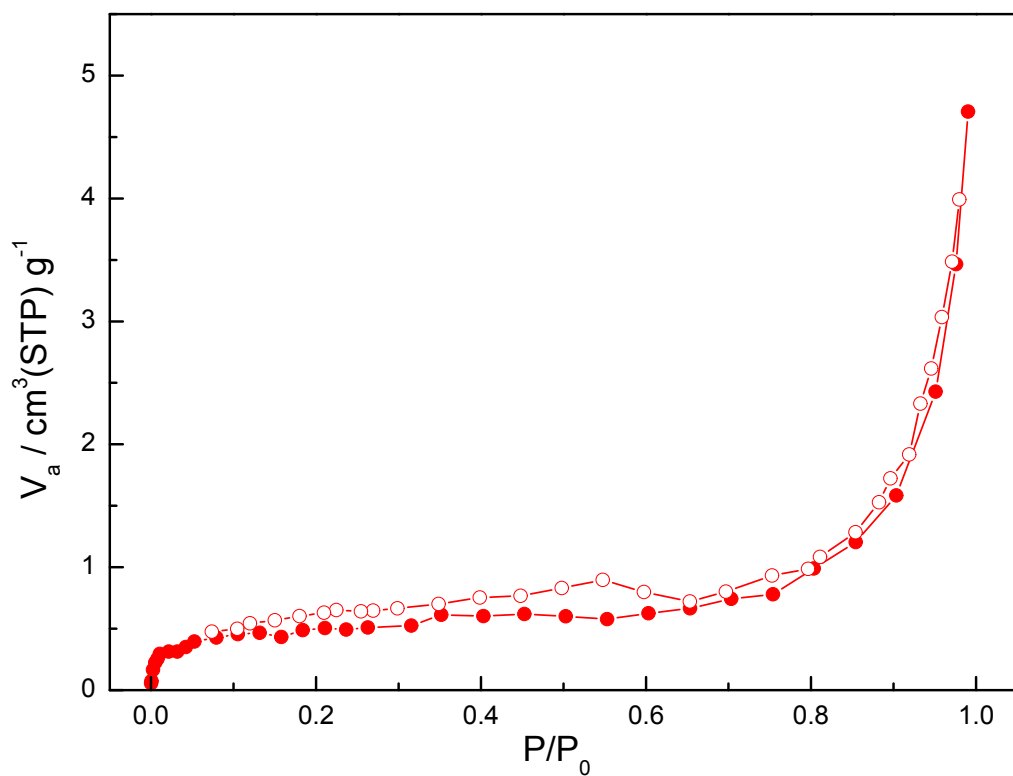

(a)

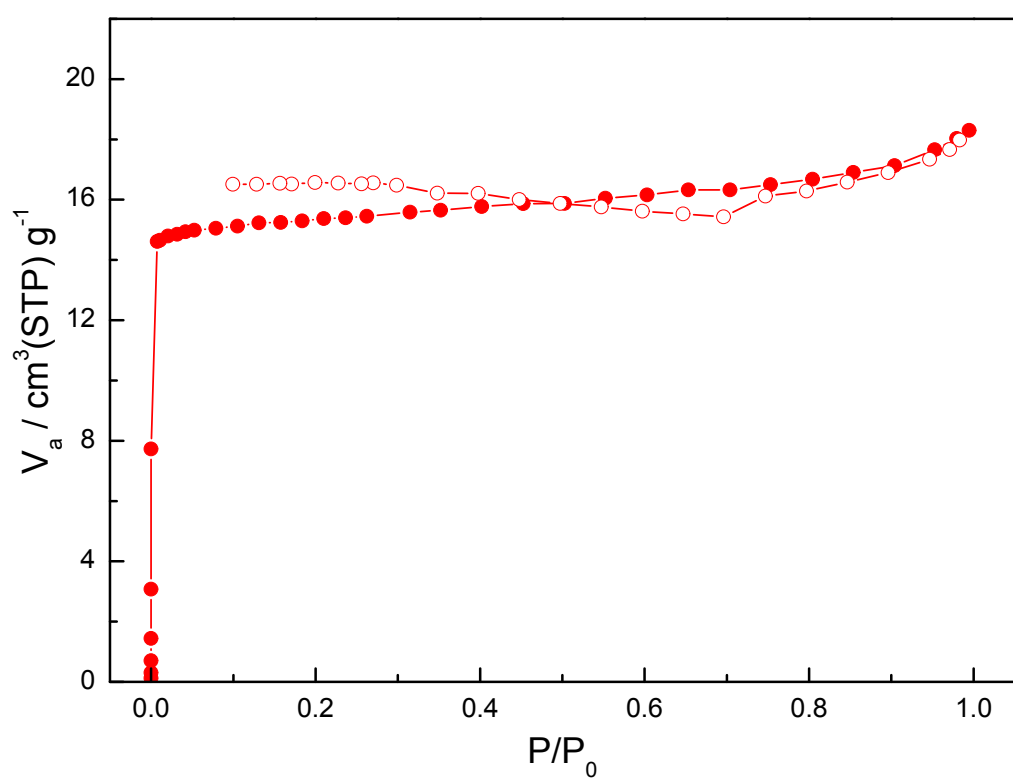

(b)

Figure S6. (a) N<sub>2</sub> ad-/desorption isotherms of dehydrated species 1 at 77 K. (b) N<sub>2</sub> ad-/desorption isotherms of dehydrated species 2 at 77 K.
